# Supplementary material for: Measurement of Telomere Length in Colorectal Cancers for Improved Molecular Diagnosis
Source: MDPI journal article supplement (doi:10.3390/ijms18091871), 2017-08-29
Supplement: s1 [file s1]

**Table S1.** Telomere mean lengths <sup>a</sup> and ranges in the 135 tumors and their respective healthy adjacent tissue (cont.) <sup>b</sup>

| <i>n</i> <sup>o</sup> | Telomere<br>mean length<br>cont. | Telomere<br>mean length<br>tumor | Range of<br>telomere<br>length<br>cont. | Range of<br>telomere<br>length<br>tumor |
|-----------------------|----------------------------------|----------------------------------|-----------------------------------------|-----------------------------------------|
| 1                     | N/A <sup>c</sup>                 | N/A                              | N/A                                     | N/A                                     |
| 2                     | 10                               | 8                                | 20-5                                    | 20-3                                    |
| 3                     | 8                                | 10                               | 20-5                                    | 20-5                                    |
| 4                     | 7                                | 6                                | 20-5                                    | 20-3                                    |
| 5                     | 10                               | 8                                | 20-5                                    | 20-3                                    |
| 6                     | 9                                | 8                                | 20-6                                    | 20-5                                    |
| 7                     | 8                                | 7                                | 20-6                                    | 20-3                                    |
| 8                     | 10                               | 6                                | 20-7                                    | 15-3                                    |
| 9                     | 8                                | 5                                | 20-6                                    | 15-2                                    |
| 10                    | 8                                | 5                                | 20-5                                    | 20-3                                    |
| 11                    | 15                               | 8                                | 20-5                                    | 20-3                                    |
| 12                    | 15                               | 15                               | 20-5                                    | 20-3                                    |
| 13                    | 8                                | N/A                              | 15-5                                    | N/A                                     |
| 14                    | 15                               | 7                                | 20-7                                    | 15-3                                    |
| 15                    | 8                                | 7                                | 20-6                                    | 15-5                                    |
| 16                    | 10                               | N/A                              | 20-6                                    | N/A                                     |
| 17                    | 7                                | 7                                | 20-5                                    | 20-5                                    |
| 18                    | 10                               | 10                               | 20-5                                    | 20-5                                    |
| 19                    | 15                               | 4                                | 20-9                                    | 15-3                                    |
| 20                    | 15                               | 10                               | 20-6                                    | 20-2                                    |
| 21                    | 10                               | 8                                | 20-7                                    | 20-3                                    |
| 22                    | 9                                | 7                                | 20-5                                    | 20-3                                    |
| 23                    | 10                               | 8                                | 20-6                                    | 20-3                                    |
| 24                    | 15                               | 5                                | 20-6                                    | 20-2                                    |
| 25                    | N/A                              | N/A                              | N/A                                     | N/A                                     |
| 26                    | 10                               | 6                                | 20-5                                    | 20-3                                    |
| 27                    | 8                                | 5                                | 10-5                                    | 8-3                                     |
| 28                    | 15                               | 15                               | 20-8                                    | 20-4                                    |
| 29                    | 7                                | 4                                | 10-4                                    | 8-3                                     |
| 30                    | 10                               | 6                                | 20-5                                    | 20-3                                    |
| 31                    | 7                                | 4                                | 20-5                                    | 20-3                                    |
| 32                    | 6                                | 5                                | 20-5                                    | 20-3                                    |
| 33                    | 8                                | 4                                | 20-5                                    | 10-3                                    |
| 34                    | 15                               | 8                                | 20-6                                    | 20-3                                    |
| 35                    | 10                               | 10                               | 20-6                                    | 20-7                                    |
| 36                    | 18                               | 15                               | 20-10                                   | 20-7                                    |
| 37                    | 10                               | 10                               | 20-8                                    | 20-8                                    |
| 38                    | 10                               | 5                                | 20-5                                    | 8-3                                     |
| 39                    | 15                               | 5                                | 20-8                                    | 20-3                                    |
| 40                    | 5                                | 8                                | 20-5                                    | 20-4                                    |
| 41                    | 10                               | 6                                | 20-5                                    | 20-4                                    |
| 42                    | 10                               | 8                                | 20-5                                    | 20-5                                    |
| 43                    | 7                                | 5                                | 15-4                                    | 15-2                                    |
| 44                    | 8                                | N/A                              | 10-6                                    | N/A                                     |
| 45                    | 10                               | 10                               | 20-8                                    | 20-8                                    |
| 46                    | 10                               | 10                               | 20-8                                    | 20-8                                    |
| 47                    | 10                               | 7                                | 20-6                                    | 20-3                                    |
| 48                    | N/A                              | N/A                              | N/A                                     | N/A                                     |
| 49                    | 15                               | 5                                | 20-6                                    | 20-3                                    |

|     |     |     |      |      |
|-----|-----|-----|------|------|
| 50  | 8   | 8   | 20-5 | 15-7 |
| 51  | 8   | 5   | 20-5 | 15-3 |
| 52  | 8   | 6   | 20-4 | 20-4 |
| 53  | N/A | N/A | N/A  | N/A  |
| 54  | 8   | 4   | 20-4 | 10-2 |
| 55  | 10  | 6   | 20-5 | 20-3 |
| 56  | 10  | 4   | 20-8 | 20-3 |
| 57  | 6   | 6   | 20-4 | 20-4 |
| 58  | 7   | 8   | 20-4 | 20-6 |
| 59  | 10  | 6   | 20-8 | 20-3 |
| 60  | 10  | 6   | 20-5 | 10-3 |
| 61  | 10  | 8   | 20-6 | 20-4 |
| 62  | 7   | 6   | 20-5 | 20-3 |
| 63  | 10  | 4   | 20-5 | 20-1 |
| 64  | 15  | 10  | 20-8 | 20-4 |
| 65  | 9   | 5   | 20-5 | 20-3 |
| 66  | 7   | 5   | 20-5 | 20-3 |
| 67  | 10  | 10  | 20-7 | 20-7 |
| 68  | 10  | 8   | 20-6 | 20-3 |
| 69  | 10  | 6   | 20-6 | 15-3 |
| 70  | 10  | 4   | 20-6 | 20-3 |
| 71  | 10  | 9   | 20-6 | 20-4 |
| 72  | 7   | 7   | 20-5 | 10-6 |
| 73  | 15  | 10  | 20-8 | 20-3 |
| 74  | 8   | N/A | 15-4 | N/A  |
| 75  | 7   | 6   | 20-5 | 20-3 |
| 76  | 8   | 8   | 20-5 | 20-5 |
| 77  | 8   | 6   | 20-5 | 10-4 |
| 78  | 8   | 6   | 20-5 | 20-3 |
| 79  | 7   | 7   | 20-5 | 20-5 |
| 80  | 7   | 7   | 20-4 | 20-4 |
| 81  | 7   | 5   | 20-5 | 20-3 |
| 82  | 8   | 6   | 20-5 | 20-4 |
| 83  | 8   | 8   | 20-8 | 20-5 |
| 84  | 10  | 8   | 20-8 | 20-6 |
| 85  | 10  | 10  | 20-5 | 15-7 |
| 86  | 8   | 6   | 20-8 | 20-5 |
| 87  | 7   | 6   | 10-4 | 10-4 |
| 88  | 5   | 10  | 10-4 | 20-8 |
| 89  | 8   | 7   | 20-6 | 20-5 |
| 90  | 8   | 10  | 10-5 | 10-5 |
| 91  | 8   | 6   | 20-5 | 20-4 |
| 92  | 8   | 5   | 15-6 | 10-3 |
| 93  | 8   | 6   | 15-5 | 10-4 |
| 94  | 8   | N/A | 20-5 | N/A  |
| 95  | 8   | 6   | 20-5 | 10-4 |
| 96  | 8   | 6   | 20-6 | 10-4 |
| 97  | 8   | 8   | 20-4 | 20-4 |
| 98  | 8   | 7   | 20-6 | 10-4 |
| 99  | 15  | 7   | 20-5 | 20-3 |
| 100 | 8   | 8   | 20-5 | 20-5 |
| 101 | 7   | 6   | 10-5 | 10-3 |
| 102 | 8   | 6   | 10-4 | 10-4 |
| 103 | 9   | 9   | 20-7 | 20-7 |
| 104 | 10  | 10  | 20-7 | 20-7 |
| 105 | 15  | 5   | 20-7 | 20-3 |
| 106 | 9   | 9   | 20-7 | 20-7 |

|     |    |     |      |      |
|-----|----|-----|------|------|
| 107 | 9  | 6   | 20-7 | 20-4 |
| 108 | 10 | 8   | 20-6 | 20-4 |
| 109 | 8  | N/A | 20-4 | N/A  |
| 110 | 7  | 6   | 10-5 | 10-4 |
| 111 | 15 | 15  | 20-5 | 20-5 |
| 112 | 15 | 6   | 20-6 | 15-6 |
| 113 | 10 | 10  | 20-5 | 20-4 |
| 114 | 15 | 10  | 20-5 | 20-2 |
| 115 | 10 | 5   | 20-6 | 20-2 |
| 116 | 10 | 9   | 20-6 | 20-5 |
| 117 | 6  | 6   | 20-4 | 20-4 |
| 118 | 7  | 6   | 20-5 | 20-3 |
| 119 | 8  | 6   | 20-6 | 10-4 |
| 120 | 10 | 7   | 20-5 | 20-3 |
| 121 | 15 | 7   | 20-8 | 20-4 |
| 122 | 10 | 7   | 20-5 | 20-3 |
| 123 | 15 | 10  | 20-8 | 20-6 |
| 124 | 7  | 7   | 20-5 | 20-4 |
| 125 | 8  | 6   | 20-6 | 20-4 |
| 126 | 10 | 10  | 20-6 | 20-6 |
| 127 | 15 | 7   | 20-6 | 10-3 |
| 128 | 10 | 8   | 20-6 | 20-4 |
| 129 | 8  | 8   | 20-6 | 20-3 |
| 130 | 8  | 5   | 20-5 | 20-3 |
| 131 | 10 | 8   | 20-5 | 20-3 |
| 132 | 10 | 8   | 20-5 | 20-4 |
| 133 | 8  | 8   | 20-5 | 20-5 |
| 134 | 10 | 7   | 20-6 | 20-3 |
| 135 | 10 | 6   | 20-5 | 20-5 |

<sup>a</sup>: Telomere length, expressed in kilobases (Kb) was measured by TRF (Telomere Restriction Fragment) analysis. Mean values; represented size in Kb in the middle of the smear (see Fig. 1) while ranges indicate the upper and bottom limits of the smear; <sup>b</sup>: Tumors in which mean telomere length was larger than that in the corresponding control (5) are written over blue background, while those in which tumor telomere length was approximately equal to that in the healthy surrounding tissue (29) are written in red over yellow background; <sup>c</sup>: N/A stands for Non Applicable.
